# Supplementary material for: Two 5-(thiophene-2-yl)oxazole derived “turn on” fluorescence chemosensors for detection of Ga3+ and practical applications
Source: Royal Society of Chemistry journal article supplement (doi:10.1039/d2nj01672a), 2022-01-01
Supplement: d2nj01672a1.pdf [file d2nj01672a1.pdf]

Electronic Supplementary Material (ESI) for New Journal of Chemistry.

## Supporting Information

Comparison of two 5-(thiophene-2-yl)oxazole derived “turn on” fluorescence chemosensors for detection of Ga<sup>3+</sup> and practical applications

Yuanying Liu<sup>a</sup>, Haitao Wang<sup>b,\*</sup>, Xiaochuan Guo<sup>a</sup>, Yujing Xing<sup>a</sup>, Kehui Wei<sup>a</sup>, Mingyi Kang<sup>a</sup>, Xiaofeng Yang<sup>a</sup>, Meishan Pei<sup>a</sup> and Guangyou Zhang<sup>a,\*</sup>

<sup>a</sup> *School of chemistry and chemical engineering, University of Jinan, Jinan 250022, China. E-mail address: chm\_zhanggy@ujn.edu.cn.*

<sup>b</sup> *Henan Sanmenxia Aoke Chemical Industry Co. Ltd., Sanmenxia 472000, China. E-mail address: wht0405@126.com.*

**\*Corresponding author:** Guangyou Zhang, E-mail address: chm\_zhanggy@ujn.edu.cn. HaiTao Wang, E-mail address: wht0405@126.com.

## Table of Contents

1. **Figure S1.**  $^1\text{H}$  NMR in DMSO- $d_6$  spectrum of **L1**.
2. **Figure S2.**  $^{13}\text{C}$  NMR in DMSO- $d_6$  spectrum of **L1**.
3. **Figure S3.** The FTIR spectrum of **L1**.
4. **Figure S4.** ESI-MS spectrum of the **L1**.
5. **Figure S5.**  $^1\text{H}$  NMR in DMSO- $d_6$  spectrum of **L2**.
6. **Figure S6.**  $^{13}\text{C}$  NMR in DMSO- $d_6$  spectrum of **L2**.
7. **Figure S7.** The FTIR spectrum of **L2**.
8. **Figure S8.** ESI-MS spectrum of the **L2**.
9. **Figure S9.** Fluorescence emission intensity of **L1** (a) and **L2** (b) towards  $\text{Ga}^{3+}$  as a function of time.
10. **Figure S10.** UV-vis spectra of **L1** (a) and **L2** (b) in the presence of different metal ions in DMSO/ $\text{H}_2\text{O}$  buffer solution.
11. **Figure S11.** Benesi-Hildebrand plot of **L1** and **L2**, assuming 1:2 stoichiometry for association between sensors and  $\text{Ga}^{3+}$ .
12. **Figure S12.** Absorbance titration spectra of complex **L1** (a) and **L2** (b) with addition of  $\text{Ga}^{3+}$  in DMSO/ $\text{H}_2\text{O}$  tris buffer solution.
13. **Figure S13.** Job's plot of the **L1** (a) and **L2** (b) in DMSO/ $\text{H}_2\text{O}$  buffer solution.
14. **Figure S14.** ESI-MS of **L1** with addition of  $\text{Ga}^{3+}$ .
15. **Figure S15.** ESI-MS of **L2** with addition of  $\text{Ga}^{3+}$ .
16. **Figure S16.** The HOMO and LUMO orbital distributions and energy levels of **L1**, **L1-Ga<sup>3+</sup>** and **L2**, **L2-Ga<sup>3+</sup>**.
17. **Table S1.** Determination of the  $\text{Ga}^{3+}$  concentration in tap water samples with **L1**.
18. **Table S2.** Determination of the  $\text{Ga}^{3+}$  concentration in tap water samples with **L2**.

## Calculation of quantum yield, detection limit, association constant

The quantum yield was calculated according to the following formula (1):

$$\Phi_u = \Phi_s \frac{F_u A_s n_u^2}{F_s A_u n_s^2}$$

$\Phi$ ,  $F$ ,  $A$ , and  $n$  represent the quantum yield, the integrated area under the corrected emission spectra, the absorbance intensity at the excitation wavelength and the refractive index of solvent, respectively. In addition,  $s$  refers to rhodamine B as the standard, and  $u$  refers to the target. The quantum yield ( $\Phi$ ) of rhodamine B dissolved in anhydrous ethanol is 0.97.

The detection limit of **L1** and **L2** for  $\text{Ga}^{3+}$  were calculated by the following formula (2):

$$LOD = 3\sigma/s$$

where  $\sigma$  is the standard deviation of 10 times the intensity of free **L1** and **L2** (**L1**- $\text{Ga}^{3+}$  and **L2**- $\text{Ga}^{3+}$ ), and  $s$  is the slope of the emission intensity of **L1** and **L2** (**L1**- $\text{Ga}^{3+}$  and **L2**- $\text{Ga}^{3+}$ ) as a function of the  $\text{Ga}^{3+}$  concentration.

The association constant between **L1** and **L2** for  $\text{Ga}^{3+}$  were calculated by the following formula (3):

$$\frac{1}{\Delta F} = \frac{1}{\Delta F_{max}} + \frac{1}{K\Delta F_{max}} \cdot \frac{1}{[\text{Ga}^{3+}]^2}$$

where  $\Delta F = F - F_0$  and  $\Delta F_{max} = F_{max} - F_0$ , with  $F_0$ ,  $F$  and  $F_{max}$  being the fluorescence intensities of the free sensor, at various concentration of  $\text{Ga}^{3+}$  and at the maximum concentration of  $\text{Ga}^{3+}$  respectively.

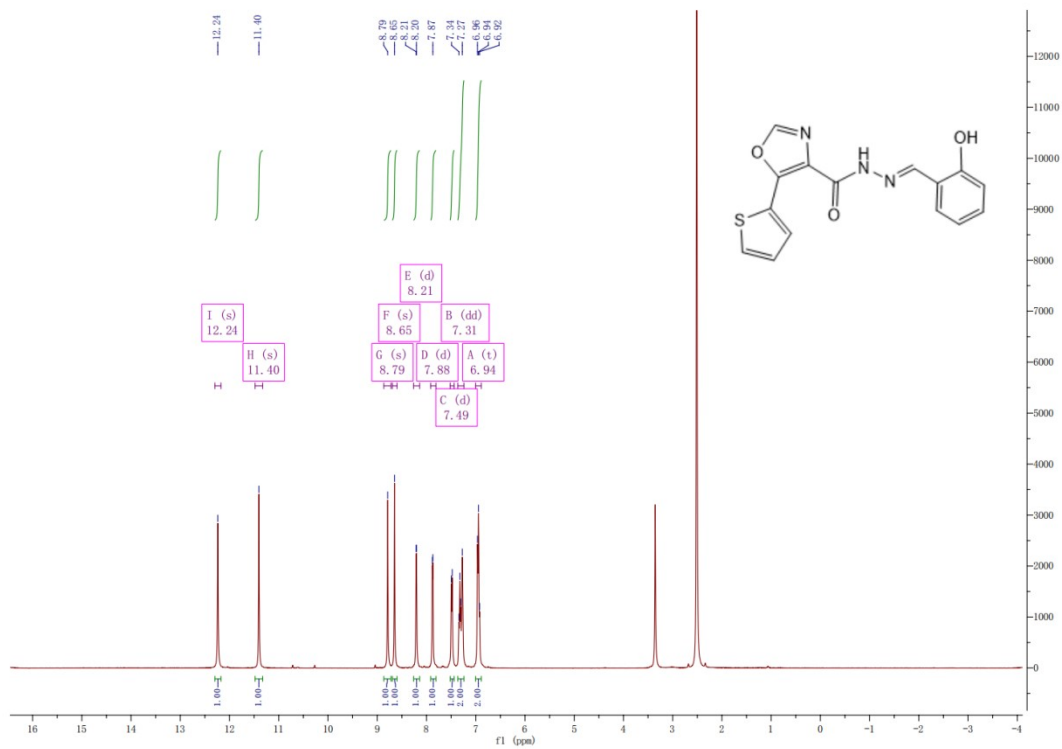

**Fig. S1.**  $^1\text{H}$  NMR in  $\text{DMSO-}d_6$  spectrum of L1.

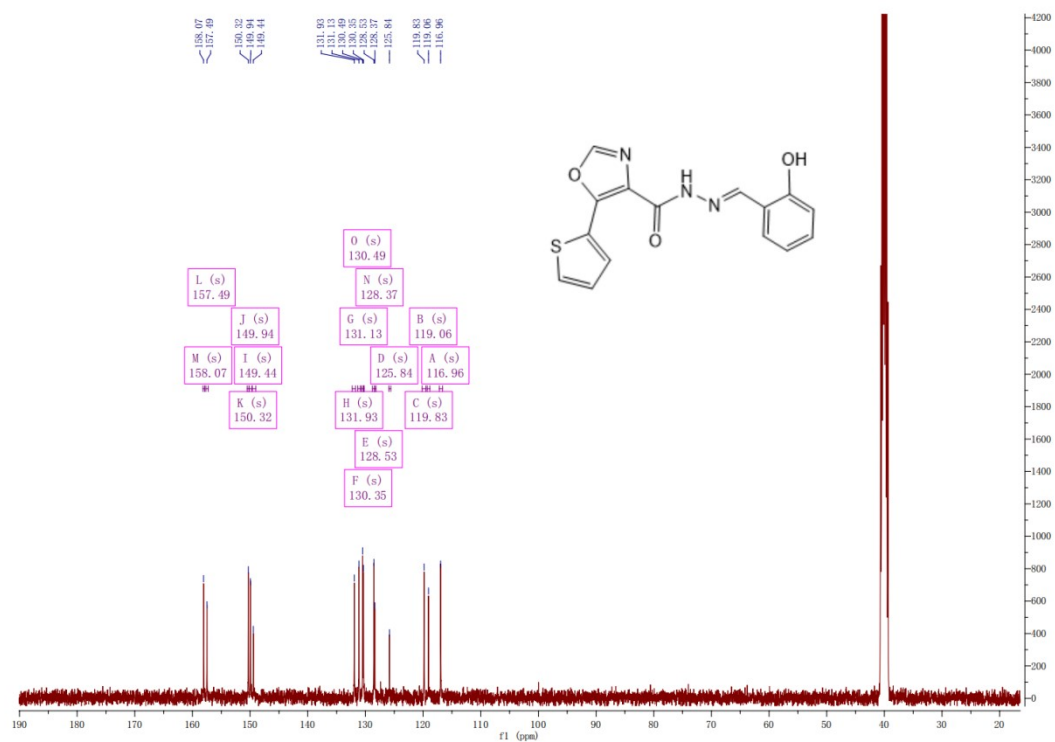

**Fig. S2.**  $^{13}\text{C}$ -NMR in  $\text{DMSO-}d_6$  spectrum of L1.

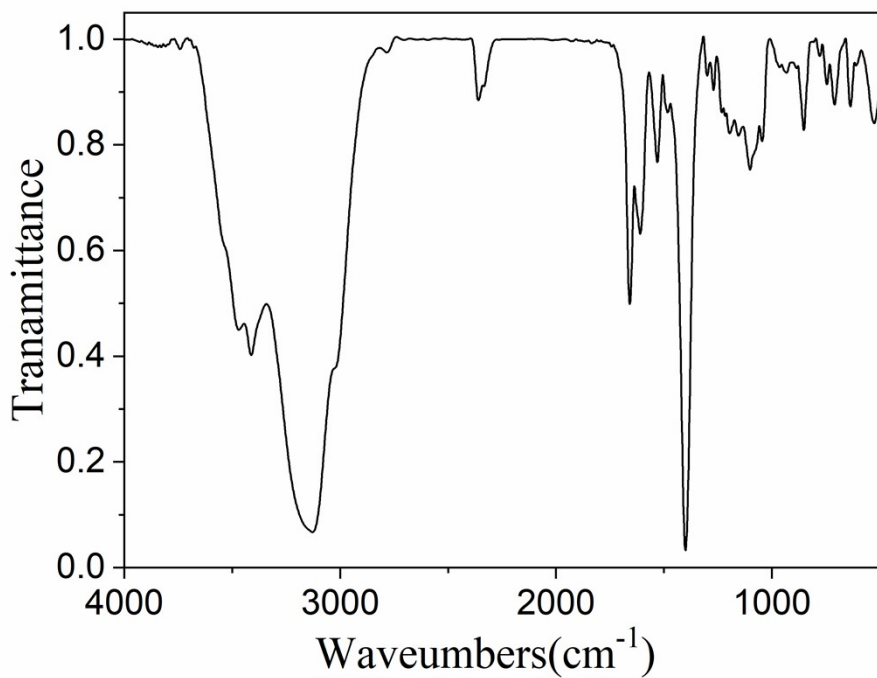

Figure S3. The FTIR spectrum of L1.

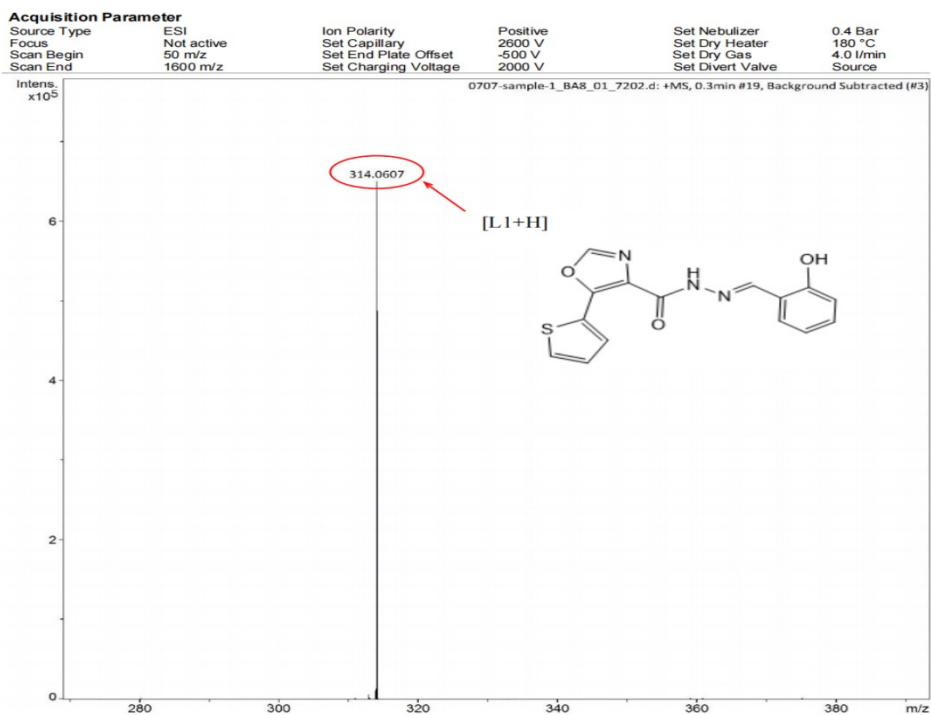

Figure S4. ESI-MS spectrum of L1.

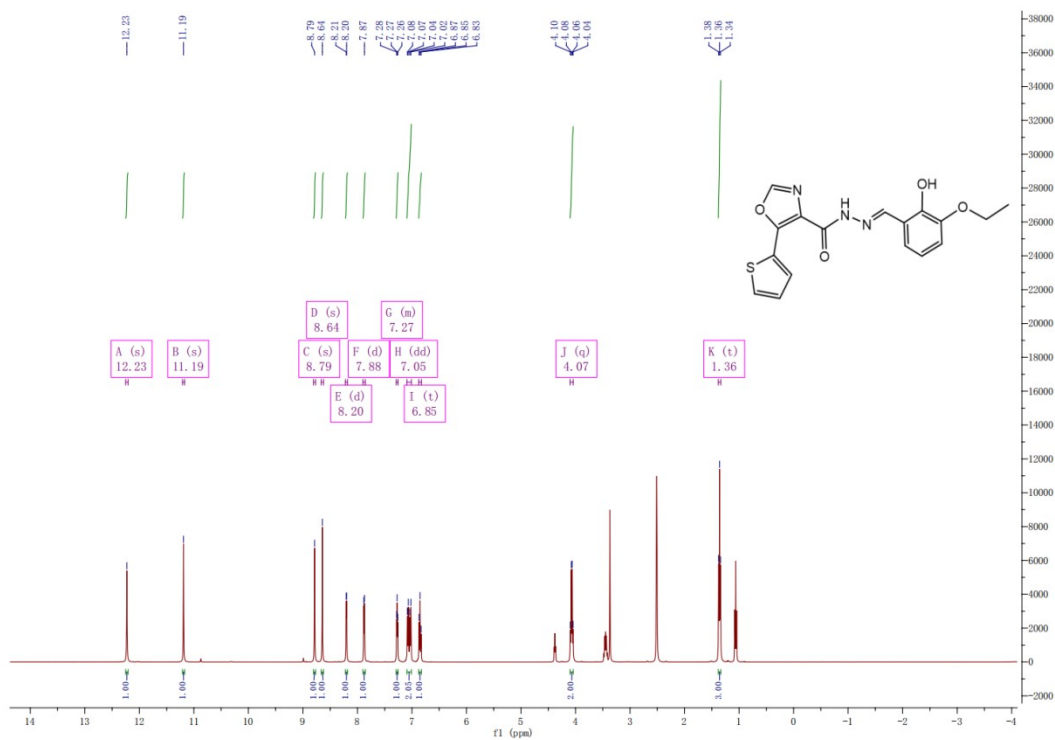

Fig. S5.  $^1\text{H}$  NMR in  $\text{DMSO-}d_6$  spectrum of L2.

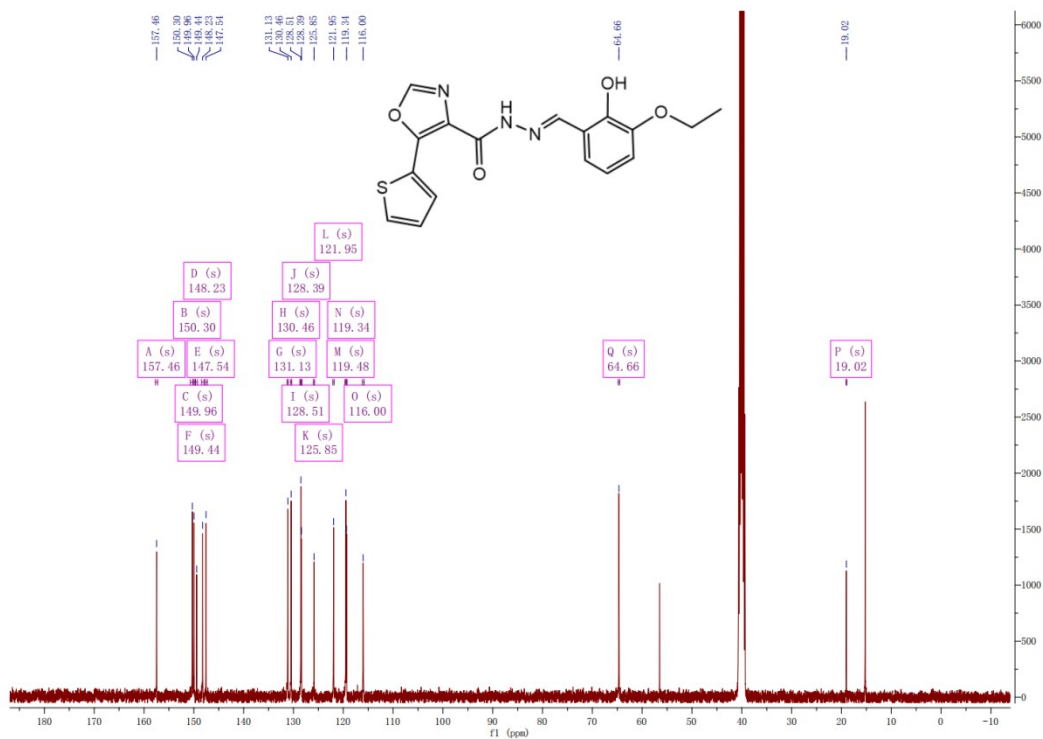

Fig. S6.  $^{13}\text{C}$  NMR in  $\text{DMSO-}d_6$  spectrum of L2.

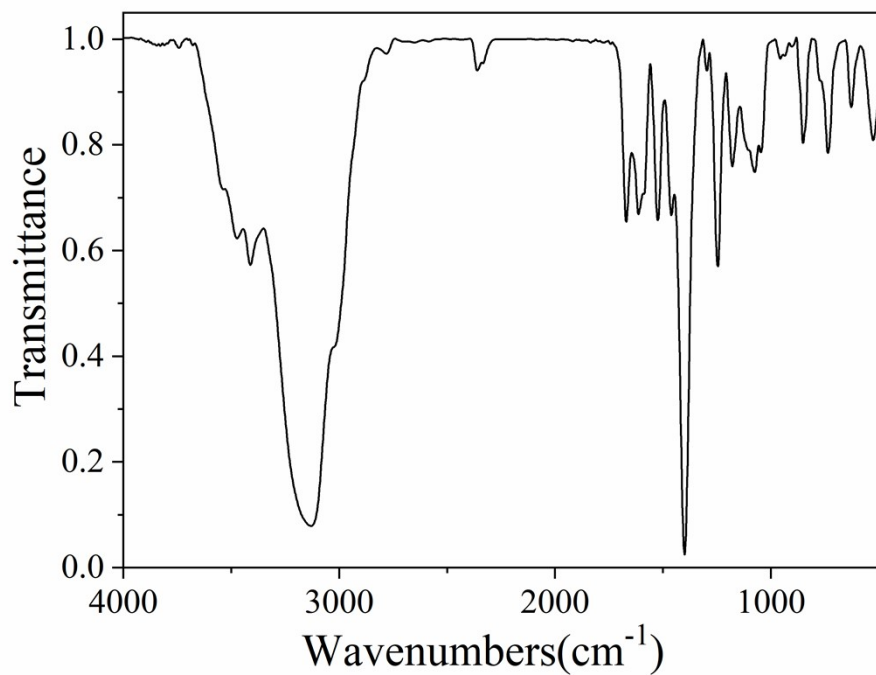

**Figure S7.** The FTIR spectrum of L2.

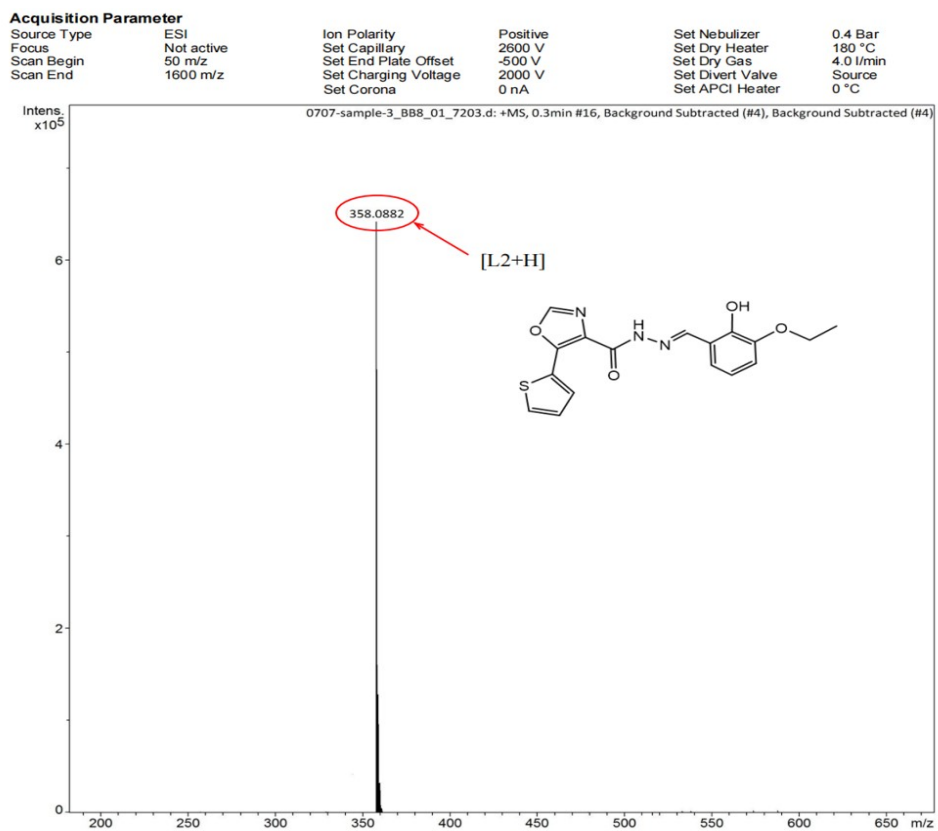

**Fig. S8.** ESI-MS spectrum of the probe L2.

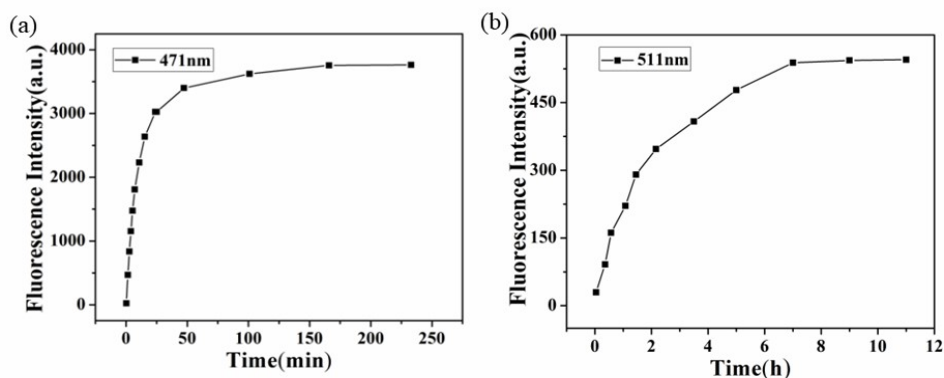

**Fig. S9.** Fluorescence emission intensity of **L1** (a) at 471 nm towards  $\text{Ga}^{3+}$  (5 equiv.) and **L2** (b) at 511 nm towards  $\text{Ga}^{3+}$  (10 equiv.) as a function of time.

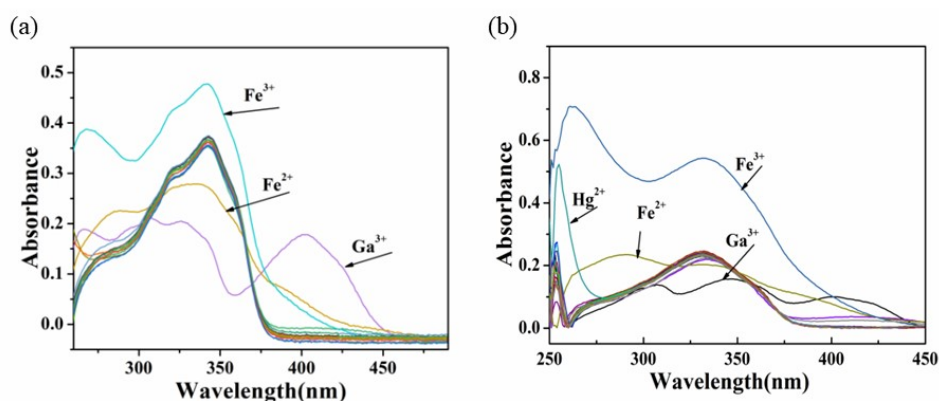

**Fig. S10.** UV-vis spectra of **L1** (a) and **L2** (b) in the presence of different metal ions ( $\text{Ga}^{3+}$ ,  $\text{Al}^{3+}$ ,  $\text{In}^{3+}$ ,  $\text{Zn}^{2+}$ ,  $\text{Cd}^{2+}$ ,  $\text{Hg}^{2+}$ ,  $\text{Cu}^{2+}$ ,  $\text{Ag}^{+}$ ,  $\text{Ni}^{2+}$ ,  $\text{Co}^{2+}$ ,  $\text{Fe}^{3+}$ ,  $\text{Mn}^{2+}$ ,  $\text{Cr}^{3+}$ ,  $\text{Ca}^{2+}$ ,  $\text{Ba}^{2+}$ ,  $\text{Li}^{+}$ ,  $\text{Na}^{+}$ , and  $\text{K}^{+}$ ) (5 equiv. for **L1** and 10 equiv. for **L2**) in DMSO/ $\text{H}_2\text{O}$  buffer solution ( $\text{V}/\text{V} = 9:1$ , Tris = 10 mM, pH = 7.4).

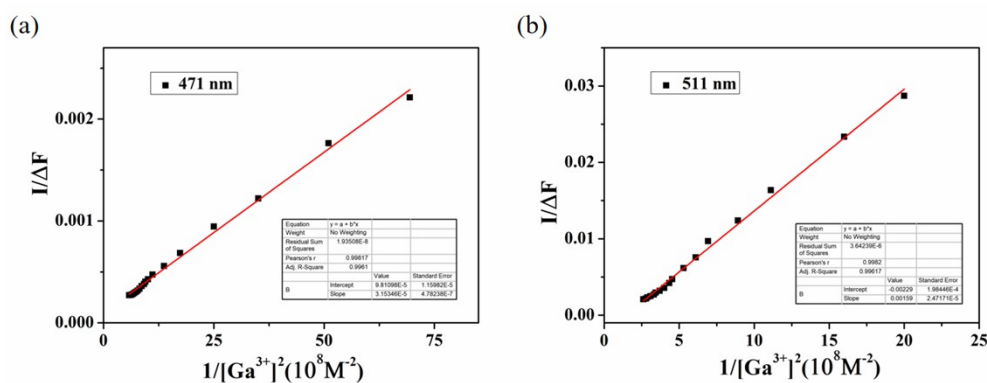

**Fig. S11.** Benesi-Hildebrand plot of **L1** (a) and **L2** (b), assuming 1:2 stoichiometry for association between sensors and  $\text{Ga}^{3+}$ .



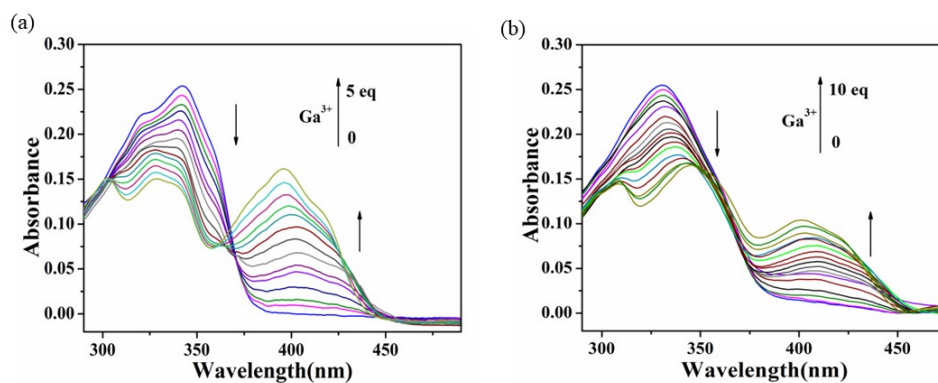

**Fig. S12.** Absorbance titration spectra of complex **L1** (a) and **L2** (b) with addition of Ga<sup>3+</sup> (5 equiv. for **L1** and 10 equiv. for **L2**) in DMSO/H<sub>2</sub>O tris buffer solution (V/V = 9:1, Tris = 10 mM, pH = 7.4)

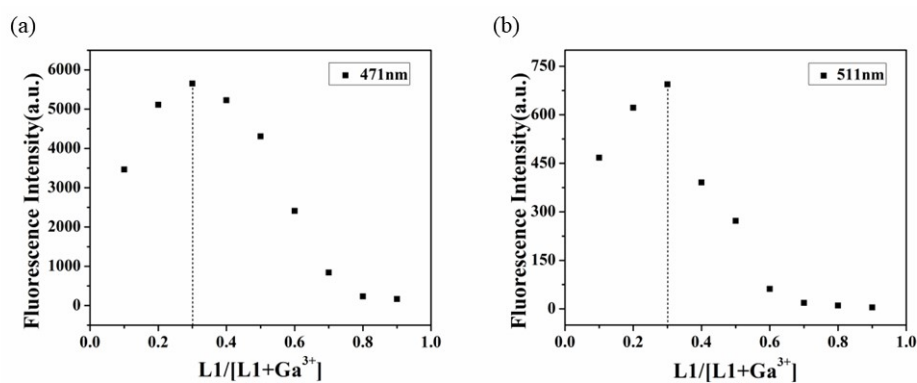

**Fig. S13.** Job's plot of the **L1** (a) and **L2** (b) in DMSO/H<sub>2</sub>O buffer solution (V/V = 9:1, Tris = 10 mM, pH = 7.4).

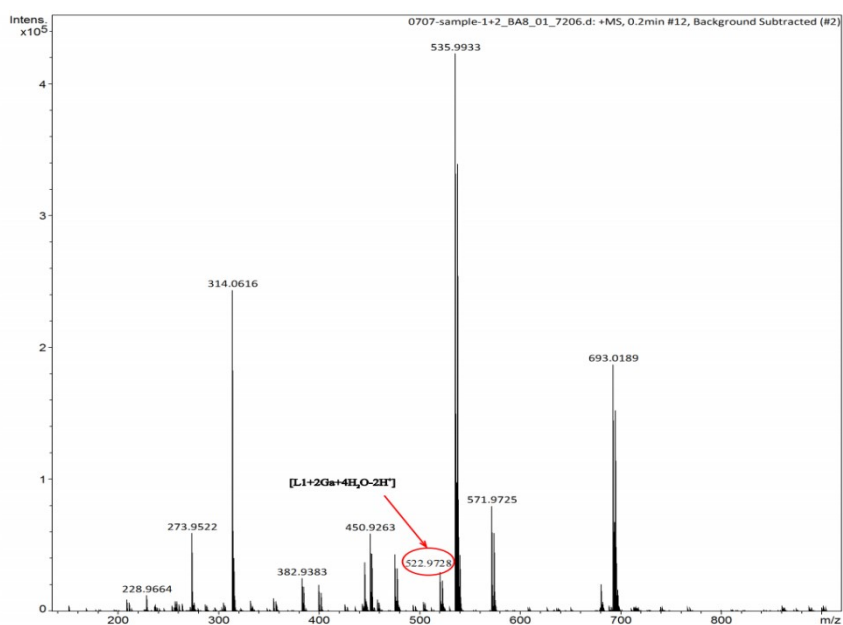

**Figure S14.** ESI-MS of **L1** with addition of Ga<sup>3+</sup>.

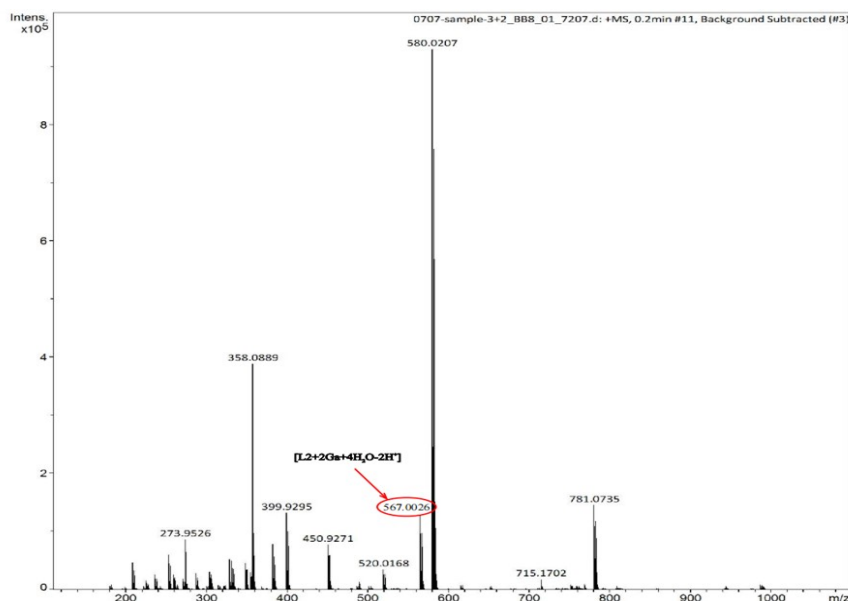

**Figure S15.** ESI-MS of L2 with addition of  $\text{Ga}^{3+}$ .

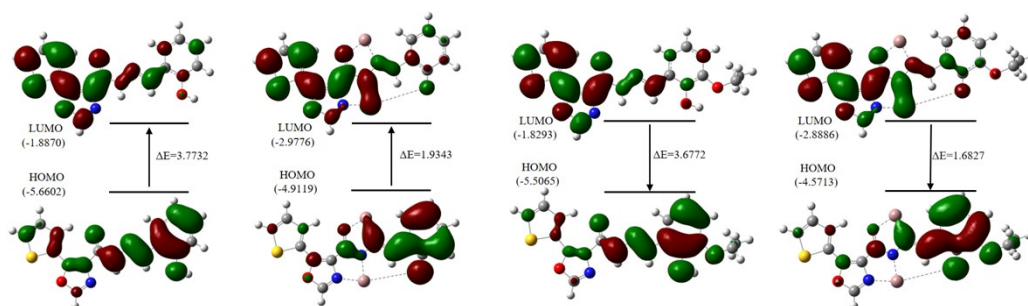

**Fig. S16.** The HOMO and LUMO orbital distributions and energy levels of L1, L1- $\text{Ga}^{3+}$  and L2, L2- $\text{Ga}^{3+}$ .

**Table S1** Determination of the  $\text{Ga}^{3+}$  concentration in tap water samples with L1

| Sample | $\text{Ga}^{3+}$ added<br>( $\text{mol}\cdot\text{L}^{-1}$ ) | $\text{Ga}^{3+}$ recovered<br>( $\text{mol}\cdot\text{L}^{-1}$ ) | Recovery<br>(%) | RSD<br>(%) |
|--------|--------------------------------------------------------------|------------------------------------------------------------------|-----------------|------------|
| 1      | $1.00 \times 10^{-5}$                                        | $0.93 \times 10^{-5}$                                            | 93.37           | 0.21       |
| 2      | $3.00 \times 10^{-5}$                                        | $2.97 \times 10^{-5}$                                            | 98.99           | 0.24       |
| 3      | $5.00 \times 10^{-5}$                                        | $4.88 \times 10^{-5}$                                            | 97.51           | 0.35       |

**Table S2** Determination of the  $\text{Ga}^{3+}$  concentration in tap water samples with L2

| Sample | $\text{Ga}^{3+}$ added<br>( $\text{mol}\cdot\text{L}^{-1}$ ) | $\text{Ga}^{3+}$ recovered<br>( $\text{mol}\cdot\text{L}^{-1}$ ) | Recovery<br>(%) | RSD<br>(%) |
|--------|--------------------------------------------------------------|------------------------------------------------------------------|-----------------|------------|
| 1      | $4.00 \times 10^{-5}$                                        | $4.09 \times 10^{-5}$                                            | 102.20          | 0.34       |
| 2      | $6.00 \times 10^{-5}$                                        | $5.85 \times 10^{-5}$                                            | 97.43           | 0.16       |
| 3      | $7.00 \times 10^{-5}$                                        | $6.82 \times 10^{-5}$                                            | 97.48           | 0.14       |

R.S.D =  $\text{SD}/\text{X}$ . Where SD is the standard deviation of 3 recovered measurements, and X is the arithmetic average value of 3 recovered measurements.
